# Supplementary material
Source: ML conference proceedings conference paper supplement (https://proceedings.neurips.cc/paper_files/paper/2015/hash/d14220ee66aeec73c49038385428ec4c-Abstract.html)
Supplement: Supplementary file [file d14220ee66aeec73c49038385428ec4c-Supplemental.zip]

# Supplement

## A Definitions & notation

Let  $(Z, \rho)$  be a metric space,  $(\Omega, \mathcal{A})$  a measurable space and  $L_0(\Omega, \mathcal{A})$  denotes the set of  $(\Omega, \mathcal{A}) \mapsto \mathbb{R}$  measurable functions. A family of maps  $\mathcal{G} = \{g_z\}_{z \in Z} \subseteq L_0(\Omega, \mathcal{A})$  is called a separable Carathéodory family w.r.t.  $Z$  if  $(Z, \rho)$  is separable and  $z \mapsto g_z(\omega)$  is continuous for all  $\omega \in \Omega$ . Let  $\mathcal{G} \subseteq L_0(\Omega, \mathcal{A})$ ,  $\varepsilon = (\varepsilon_1, \dots, \varepsilon_m)$  be a Rademacher sequence, i.e.,  $\varepsilon_j$ -s are i.i.d. and  $\mathbb{P}(\varepsilon_j = 1) = \mathbb{P}(\varepsilon_j = -1) = \frac{1}{2}$ , and  $(\omega_j)_{j=1}^m \in \Omega^m$ . The Rademacher average of  $\mathcal{G}$  is defined as  $\mathcal{R}(\mathcal{G}, \omega_{1:m}) := \mathbb{E}_\varepsilon \sup_{g \in \mathcal{G}} \left| \frac{1}{m} \sum_{j=1}^m \varepsilon_j g(\omega_j) \right|$ ; we use the shorthand  $\omega_{1:m} = (\omega_1, \dots, \omega_m)$ .  $S \subseteq Z$  is said to be an  $r$ -net of  $Z$  if for any  $z \in Z$  there is an  $s \in S$  such that  $\rho(s, z) \leq r$ . The  $r$ -covering number of  $Z$  is defined as the size of the smallest  $r$ -net, i.e.,  $\mathcal{N}(Z, \rho, r) = \inf \{ \ell \geq 1 : \exists s_1, \dots, s_\ell \text{ such that } Z \subseteq \cup_{j=1}^\ell B_\rho(s_j, r) \}$ , where  $B_\rho(s, r) = \{z \in Z : \rho(z, s) \leq r\}$  is the closed ball with center  $s \in Z$  and radius  $r$ .  $\log \mathcal{N}(Z, \rho, r)$  is called the metric entropy. A  $(Z, \|\cdot\|)$  Banach space is said to be of type  $q \in (1, 2]$  if there exists a constant  $C \in \mathbb{R}$  such that the  $\mathbb{E}_\varepsilon \left\| \sum_{j=1}^m \varepsilon_j f_j \right\| \leq C \left( \sum_{j=1}^m \|f_j\|^q \right)^{\frac{1}{q}}$  holds for every finite set of vectors  $\{f_j\}_{j=1}^m \subseteq Z$ . For example,  $L^r(\Omega, \mathcal{A}, \mu)$  spaces are of type  $q = \min(2, r)$  [6, page 73], where the  $C$  constant only depends on  $r$  ( $C = C_r$ ). For a  $(Z, \|\cdot\|)$  normed space,  $Z^*$  denotes the space of continuous linear functionals on  $Z$ .

## B Proofs

We provide proofs of the results presented in Sections 3 and 4. Lemmas used in the proofs are enlisted in Section C.

### B.1 Proof of Theorems 1 and 4

Below we prove Theorem 4, thereby Theorem 1 ( $\mathbf{p} = \mathbf{q} = \mathbf{0}$ ). The idea of the proof is as follows: (i) We note that

$$\|\partial^{\mathbf{p}, \mathbf{q}} k - s^{\mathbf{p}, \mathbf{q}}\|_{\mathcal{S} \times \mathcal{S}} = \sup_{\mathbf{x}, \mathbf{y} \in \mathcal{S}} |\partial^{\mathbf{p}, \mathbf{q}} k(\mathbf{x}, \mathbf{y}) - s^{\mathbf{p}, \mathbf{q}}(\mathbf{x}, \mathbf{y})| = \sup_{g \in \mathcal{G}} |\Lambda g - \Lambda_m g| =: \|\Lambda - \Lambda_m\|_{\mathcal{G}}, \quad (\text{B.1})$$

where  $\mathcal{G} := \{g_{\mathbf{z}} : \mathbf{z} \in \mathcal{S}_\Delta\}$  and  $g_{\mathbf{z}} : \text{supp}(\Lambda) \rightarrow \mathbb{R}, \omega \mapsto \omega^{\mathbf{p}}(-\omega)^{\mathbf{q}} h_{|\mathbf{p}+\mathbf{q}|}(\omega^T \mathbf{z})$ , which means the object of interest is the suprema of an empirical process indexed by  $\mathcal{G}$ . (ii) We show that  $\|\Lambda - \Lambda_m\|_{\mathcal{G}}$  is measurable w.r.t.  $\Lambda^m$  by verifying that  $\mathcal{G}$  is a separable Carathéodory family (see the discussion following Definition 7.4 in [9]). (iii) (B.1) can be shown to satisfy the bounded difference property in C.1 and therefore by McDiarmid's inequality (Lemma C.1),  $\|\Lambda - \Lambda_m\|_{\mathcal{G}}$  concentrates around its expectation. (iv) By applying the symmetrization lemma [9, Proposition 7.10] for the uniformly bounded function family  $\mathcal{G}$ , we obtain an upper bound in terms of the expected Rademacher average of  $\mathcal{G}$ . (v) The Rademacher average is bounded by the metric entropy of  $\mathcal{G}$  (making use of the Dudley's entropy integral [2, Equation 4.4]), for which we can get an estimate by showing that  $\mathcal{G}$  is a smoothly parametrized function class using the compactness of  $\mathcal{S}_\Delta$ .

- **$\mathcal{G}$  is a separable Carathéodory family:**  $\mathcal{G}$  is a separable Carathéodory family w.r.t.  $\mathcal{S}_\Delta$  since
  1.  $g_{\mathbf{z}} : \text{supp}(\Lambda) \rightarrow \mathbb{R}, \omega \mapsto \omega^{\mathbf{p}}(-\omega)^{\mathbf{q}} h_{|\mathbf{p}+\mathbf{q}|}(\omega^T \mathbf{z})$  is measurable for all  $\mathbf{z} \in \mathcal{S}_\Delta$ .
  2.  $\mathcal{S}_\Delta \subseteq \mathbb{R}^d$  is separable since  $\mathbb{R}^d$  is separable.
  3.  $\mathbf{z} \mapsto \omega^{\mathbf{p}}(-\omega)^{\mathbf{q}} h_{|\mathbf{p}+\mathbf{q}|}(\omega^T \mathbf{z})$  is continuous for all  $\omega \in \text{supp}(\Lambda)$ .
- **Concentration of  $\|\Lambda - \Lambda_m\|_{\mathcal{G}}$  by its bounded difference property:** By defining  $f(\omega_1, \dots, \omega_m) := \|\Lambda - \Lambda_m\|_{\mathcal{G}}$ , we have that for  $\forall i \in \{1, \dots, m\}$ ,

$$\begin{aligned} & |f(\omega_1, \dots, \omega_{i-1}, \omega_i, \omega_{i+1}, \dots, \omega_m) - f(\omega_1, \dots, \omega_{i-1}, \omega'_i, \omega_{i+1}, \dots, \omega_m)| = \\ & = \left| \sup_{g \in \mathcal{G}} \left| \Lambda g - \frac{1}{m} \sum_{j=1}^m g(\omega_j) \right| - \sup_{g \in \mathcal{G}} \left| \Lambda g - \frac{1}{m} \sum_{j=1}^m g(\omega_j) + \frac{1}{m} [g(\omega_i) - g(\omega'_i)] \right| \right| \leq \frac{1}{m} \sup_{g \in \mathcal{G}} |g(\omega_i) - g(\omega'_i)| \\ & \leq \frac{1}{m} \sup_{g \in \mathcal{G}} (|g(\omega_i)| + |g(\omega'_i)|) \leq \frac{1}{m} \left[ \sup_{g \in \mathcal{G}} |g(\omega_i)| + \sup_{g \in \mathcal{G}} |g(\omega'_i)| \right] \leq \frac{1}{m} [|\omega_i^{\mathbf{p}+\mathbf{q}}| + |(\omega'_i)^{\mathbf{p}+\mathbf{q}}|] \leq \frac{2T_{\mathbf{p}, \mathbf{q}}}{m}. \end{aligned}$$

Applying McDiarmid's inequality (Lemma C.1) to  $f$ , for any  $\tau > 0$ , with probability at least  $1 - e^{-\tau}$  over the choice of  $(\omega_i)_{i=1}^m \stackrel{i.i.d.}{\sim} \Lambda$ ,

$$\|\Lambda - \Lambda_m\|_{\mathcal{G}} \leq \mathbb{E}_{\omega_{1:m}} \|\Lambda - \Lambda_m\|_{\mathcal{G}} + T_{\mathbf{p}, \mathbf{q}} \sqrt{\frac{2\tau}{m}}. \quad (\text{B.2})$$

- **Bounding  $\mathbb{E}_{\omega_{1:m}} \|\Lambda - \Lambda_m\|_{\mathcal{G}}$ :** By the symmetrization lemma [9, Proposition 7.10] applied for the uniformly bounded function family  $\mathcal{G}$  ( $\sup_{g \in \mathcal{G}} \|g\|_{\infty} \leq T_{\mathbf{p}, \mathbf{q}} < \infty$ ), we have

$$\mathbb{E}_{\omega_{1:m}} \|\Lambda - \Lambda_m\|_{\mathcal{G}} \leq 2 \mathbb{E}_{\omega_{1:m}} \mathcal{R}(\mathcal{G}, \omega_{1:m}). \quad (\text{B.3})$$

- **Bounding  $\mathcal{R}(\mathcal{G}, \omega_{1:m})$ :** Using Dudley's entropy integral [2, Equation 4.4], we have

$$\mathcal{R}(\mathcal{G}, \omega_{1:m}) \leq \frac{8\sqrt{2}}{\sqrt{m}} \int_0^{|\mathcal{G}|_{L^2(\Lambda_m)}} \sqrt{\log \mathcal{N}(\mathcal{G}, L^2(\Lambda_m), r)} dr. \quad (\text{B.4})$$

The upper limit of the integral can be bounded as

$$|\mathcal{G}|_{L^2(\Lambda_m)} = \sup_{g_1, g_2 \in \mathcal{G}} \|g_1 - g_2\|_{L^2(\Lambda_m)} \leq \sup_{g_1, g_2 \in \mathcal{G}} (\|g_1\| + \|g_2\|_{L^2(\Lambda_m)}) \leq 2 \sup_{g \in \mathcal{G}} \|g\|_{L^2(\Lambda_m)} \stackrel{(*)}{\leq} 2\sqrt{T_{2\mathbf{p}, 2\mathbf{q}}}, \quad (\text{B.5})$$

where  $(*)$  follows from

$$\sup_{g \in \mathcal{G}} \|g\|_{L^2(\Lambda_m)} = \sup_{\mathbf{z} \in \mathcal{S}_{\Delta}} \sqrt{\frac{1}{m} \sum_{j=1}^m g_{\mathbf{z}}^2(\omega_j)} = \sup_{\mathbf{z} \in \mathcal{S}_{\Delta}} \sqrt{\frac{1}{m} \sum_{j=1}^m [\omega_j^{\mathbf{p}}(-\omega_j)^{\mathbf{q}} h_{|\mathbf{p}+\mathbf{q}|}(\omega_j^T \mathbf{z})]^2} \leq \sqrt{\frac{1}{m} \sum_{j=1}^m \omega_j^{2(\mathbf{p}+\mathbf{q})}} \leq \sqrt{T_{2\mathbf{p}, 2\mathbf{q}}}.$$

- **Bounding  $\mathcal{N}(\mathcal{G}, L^2(\Lambda_m), r)$  by the compactness of  $\mathcal{S}_{\Delta}$ :** For any  $g_{\mathbf{z}_1}, g_{\mathbf{z}_2} \in \mathcal{G}$ ,

$$\|g_{\mathbf{z}_1} - g_{\mathbf{z}_2}\|_{L^2(\Lambda_m)} = \|\omega \mapsto \omega^{\mathbf{p}}(-\omega)^{\mathbf{q}} (h_{|\mathbf{p}+\mathbf{q}|}(\omega^T \mathbf{z}_1) - h_{|\mathbf{p}+\mathbf{q}|}(\omega^T \mathbf{z}_2))\|_{L^2(\Lambda_m)}.$$

By the mean value theorem, there exists  $c \in (0, 1)$  such that

$$|h_{|\mathbf{p}+\mathbf{q}|}(\omega^T \mathbf{z}_1) - h_{|\mathbf{p}+\mathbf{q}|}(\omega^T \mathbf{z}_2)| \leq \|\nabla_{\mathbf{z}} h_{|\mathbf{p}+\mathbf{q}|}(\omega^T (c\mathbf{z}_1 + (1-c)\mathbf{z}_2))\|_2 \|\mathbf{z}_1 - \mathbf{z}_2\|_2,$$

where

$$\|\nabla_{\mathbf{z}} h_{|\mathbf{p}+\mathbf{q}|}(\omega^T (c\mathbf{z}_1 + (1-c)\mathbf{z}_2))\|_2 \leq \|\omega\|_2.$$

Therefore,

$$\|g_{\mathbf{z}_1} - g_{\mathbf{z}_2}\|_{L^2(\Lambda_m)} \leq \sqrt{\frac{1}{m} \sum_{j=1}^m (|\omega_j^{\mathbf{p}+\mathbf{q}}| \|\omega_j\|_2 \|\mathbf{z}_1 - \mathbf{z}_2\|_2)^2} = \|\mathbf{z}_1 - \mathbf{z}_2\|_2 \sqrt{\frac{1}{m} \sum_{j=1}^m |\omega_j^{2(\mathbf{p}+\mathbf{q})}| \|\omega_j\|_2^2}. \quad (\text{B.6})$$

(B.6) shows that the existence of an  $\epsilon$ -net on  $(\mathcal{S}_{\Delta}, \|\cdot\|_2)$  implies an  $r = \epsilon \sqrt{\frac{1}{m} \sum_{j=1}^m |\omega_j^{2(\mathbf{p}+\mathbf{q})}| \|\omega_j\|_2^2}$ -net on  $(\mathcal{G}, L^2(\Lambda_m))$ .

In other words,

$$\mathcal{N}(\mathcal{G}, L^2(\Lambda_m), r) \leq \mathcal{N}\left(\mathcal{S}_{\Delta}, \|\cdot\|_2, r \left(\frac{1}{m} \sum_{j=1}^m |\omega_j^{2(\mathbf{p}+\mathbf{q})}| \|\omega_j\|_2^2\right)^{-\frac{1}{2}}\right).$$

Define

$$A_{\mathbf{p}, \mathbf{q}} := \sqrt{\frac{1}{m} \sum_{j=1}^m |\omega_j^{2(\mathbf{p}+\mathbf{q})}| \|\omega_j\|_2^2}.$$

By using the fact that  $\mathcal{S}_{\Delta} \subseteq B_{\|\cdot\|_2}\left(\mathbf{t}, \frac{|\mathcal{S}_{\Delta}|}{2}\right)$  for some  $\mathbf{t} \in \mathbb{R}^d$  and  $\mathcal{N}(B_{\|\cdot\|_2}(\mathbf{s}, R), \|\cdot\|_2, \epsilon) \leq \left(\frac{4R}{\epsilon} + 1\right)^d$  for any  $\mathbf{s} \in \mathbb{R}^d$  [10, Lemma 2.5, page 20], we obtain

$$\mathcal{N}(\mathcal{G}, L^2(\Lambda_m), r) \leq \left(\frac{4|\mathcal{S}|A_{\mathbf{p}, \mathbf{q}}}{r} + 1\right)^d, \quad (\text{B.7})$$

by noting that  $|\mathcal{S}_{\Delta}| \leq 2|\mathcal{S}|$ . Using (B.5) and (B.7) in (B.4), we have

$$\mathcal{R}(\mathcal{G}, \omega_{1:m}) \leq \frac{8\sqrt{2d}}{\sqrt{m}} \int_0^{2\sqrt{T_{2\mathbf{p}, 2\mathbf{q}}}} \sqrt{\log\left(\frac{4|\mathcal{S}|A_{\mathbf{p}, \mathbf{q}}}{r} + 1\right)} dr \leq \frac{8\sqrt{2d}}{\sqrt{m}} \int_0^{2\sqrt{T_{2\mathbf{p}, 2\mathbf{q}}}} \sqrt{\log\left(\frac{4|\mathcal{S}|A_{\mathbf{p}, \mathbf{q}} + 2\sqrt{T_{2\mathbf{p}, 2\mathbf{q}}}}{r}\right)} dr, \quad (\text{B.8})$$

where in the last inequality we used the fact that  $r \leq 2\sqrt{T_{2\mathbf{p},2\mathbf{q}}}$ . By bounding  $2|\mathcal{S}|A_{\mathbf{p},\mathbf{q}} + \sqrt{T_{2\mathbf{p},2\mathbf{q}}} \leq (2|\mathcal{S}| + \sqrt{T_{2\mathbf{p},2\mathbf{q}}})(A_{\mathbf{p},\mathbf{q}} + 1)$ , (B.8) reduces to

$$\begin{aligned} \mathcal{R}(\mathcal{G}, \omega_{1:m}) &\leq \frac{8\sqrt{2d}}{\sqrt{m}} \left( \int_0^{2\sqrt{T_{2\mathbf{p},2\mathbf{q}}}} \sqrt{\log \frac{2(2|\mathcal{S}| + \sqrt{T_{2\mathbf{p},2\mathbf{q}}})}{r}} dr + 2\sqrt{T_{2\mathbf{p},2\mathbf{q}}} \log(A_{\mathbf{p},\mathbf{q}} + 1) \right) \\ &= \frac{16\sqrt{2d}}{\sqrt{m}} \sqrt{T_{2\mathbf{p},2\mathbf{q}}} \left( \int_0^1 \sqrt{\log \frac{B_{\mathbf{p},\mathbf{q}} + 1}{r}} dr + \sqrt{\log(A_{\mathbf{p},\mathbf{q}} + 1)} \right), \end{aligned} \quad (\text{B.9})$$

where the last equality is obtained by changing the variable of integration and defining  $B_{\mathbf{p},\mathbf{q}} := \frac{2|\mathcal{S}|}{\sqrt{T_{2\mathbf{p},2\mathbf{q}}}}$ . By applying Lemma C.2 to bound the integral in (B.9), we obtain

$$\mathcal{R}(\mathcal{G}, \omega_{1:m}) \leq \frac{16\sqrt{2d}}{\sqrt{m}} \sqrt{T_{2\mathbf{p},2\mathbf{q}}} \left( \sqrt{\log(B_{\mathbf{p},\mathbf{q}} + 1)} + \frac{1}{2\sqrt{\log(B_{\mathbf{p},\mathbf{q}} + 1)}} + \sqrt{\log(A_{\mathbf{p},\mathbf{q}} + 1)} \right). \quad (\text{B.10})$$

- **Bounding the expectation of the Rademacher average:** From (B.10), we have

$$\mathbb{E}_{\omega_{1:m}} \mathcal{R}(\mathcal{G}, \omega_{1:m}) \leq \frac{16\sqrt{2d}}{\sqrt{m}} \sqrt{T_{2\mathbf{p},2\mathbf{q}}} \left[ \sqrt{\log(B_{\mathbf{p},\mathbf{q}} + 1)} + \frac{1}{2\sqrt{\log(B_{\mathbf{p},\mathbf{q}} + 1)}} + \sqrt{\log(\sqrt{C_{2\mathbf{p},2\mathbf{q}}} + 1)} \right], \quad (\text{B.11})$$

which is obtained by repeated applications of Jensen's inequality to bound  $\mathbb{E}_{\omega_{1:m}} \sqrt{\log(A_{\mathbf{p},\mathbf{q}} + 1)} \leq \sqrt{\mathbb{E}_{\omega_{1:m}} \log(A_{\mathbf{p},\mathbf{q}} + 1)} \leq \sqrt{\log(\mathbb{E}_{\omega_{1:m}} A_{\mathbf{p},\mathbf{q}} + 1)}$  where  $\mathbb{E}_{\omega_{1:m}} A_{\mathbf{p},\mathbf{q}} \leq \sqrt{\frac{1}{m} \sum_{j=1}^m \mathbb{E}_{\omega_j} [\|\omega_j^{2(\mathbf{p}+\mathbf{q})}\| \|\omega_j\|_2^2]} \leq \sqrt{C_{2\mathbf{p},2\mathbf{q}}}$ .

- **Final bound:** Combining (B.2), (B.3) and (B.11) yields the result.  $\square$

## B.2 Proof of Theorem 3

Below we prove Theorem 3: (i) We show that  $f(\omega_1, \dots, \omega_m) := \|k - \hat{k}\|_{L^r(\mathcal{S})}$  satisfies the bounded difference property, hence by the McDiarmid's inequality (Lemma C.1) it concentrates around its expectation  $\mathbb{E}\|k - \hat{k}\|_{L^r(\mathcal{S})}$ . (ii) By  $L^r(\mathcal{S}) = [L^{\tilde{r}}(\mathcal{S})]^*$  ( $\frac{1}{r} + \frac{1}{\tilde{r}} = 1$ ), the separability of  $L^{\tilde{r}}(\mathcal{S})$  and the symmetrization lemma [11, Lemma 2.3.1] the value of  $\mathbb{E}\|k - \hat{k}\|_{L^r(\mathcal{S})}$  is upper bounded in terms of  $\mathbb{E}_{\epsilon} \|\sum_{i=1}^m \epsilon_i \cos(\langle \omega_i, \cdot - \cdot \rangle)\|_{L^r(\mathcal{S})}$ . (iii) Exploiting that  $L^r(\mathcal{S})$  is of type  $\min(r, 2)$  with a constant independent of  $\mathcal{S}$ , we get the result.

- **Concentration of  $\|k - \hat{k}\|_{L^r(\mathcal{S})}$  by its bounded difference property:** Define  $\hat{k}_i(\mathbf{x}, \mathbf{y}) = \frac{1}{m} \sum_{j \neq i} \cos(\omega_j^T(\mathbf{x} - \mathbf{y})) + \frac{1}{m} \cos(\tilde{\omega}_i^T(\mathbf{x} - \mathbf{y}))$  where  $\tilde{\omega}_i$  is an i.i.d. copy of  $\omega_i$ . Then  $\|k - \hat{k}\|_{L^r(\mathcal{S})}$  satisfies the bounded difference property in (C.1):

$$\sup_{(\omega_i)_{i=1}^m, \tilde{\omega}_i} \left| \|k - \hat{k}\|_{L^r(\mathcal{S})} - \|k - \hat{k}_i\|_{L^r(\mathcal{S})} \right| \leq \sup_{(\omega_i)_{i=1}^m, \tilde{\omega}_i} \|\hat{k}_i - \hat{k}\|_{L^r(\mathcal{S})} \leq \frac{2}{m} \sup_{\omega_i} \|\cos(\langle \omega_i, \cdot - \cdot \rangle)\|_{L^r(\mathcal{S})} \leq \frac{2}{m} \text{vol}^{2/r}(\mathcal{S})$$

and therefore by McDiarmid's inequality (Lemma C.1), for any  $\tau > 0$ , with probability at least  $1 - e^{-\tau}$  over the choice of  $(\omega_i)_{i=1}^m \sim \Lambda$ , we have

$$\|k - \hat{k}\|_{L^r(\mathcal{S})} \leq \mathbb{E}_{\omega_{1:m}} \|k - \hat{k}\|_{L^r(\mathcal{S})} + \text{vol}^{2/r}(\mathcal{S}) \sqrt{\frac{2\tau}{m}}. \quad (\text{B.12})$$

- **Symmetrization, reduction to  $\mathbb{E}_{\epsilon} \|\sum_{i=1}^m \epsilon_i \cos(\langle \omega_i, \cdot - \cdot \rangle)\|_{L^r(\mathcal{S})}$ :** Let  $\tilde{r}$  be the dual exponent of  $r$ , in other words  $\frac{1}{r} + \frac{1}{\tilde{r}} = 1$ . Then, by  $L^r(\mathcal{S}) = [L^{\tilde{r}}(\mathcal{S})]^*$  and the separability of  $L^{\tilde{r}}(\mathcal{S})$ , there exists (see Lemma C.4) a countable  $\mathcal{G} \subseteq L^{\tilde{r}}(\mathcal{S})$  ( $\forall g \in \mathcal{G}$ ,  $\|g\|_{L^{\tilde{r}}(\mathcal{S})} = 1$ ) such that

$$\|k - \hat{k}\|_{L^r(\mathcal{S})} = \sup_{g \in \mathcal{G}} \left| \int_{\mathcal{S} \times \mathcal{S}} g(\mathbf{x}, \mathbf{y}) [k(\mathbf{x}, \mathbf{y}) - \hat{k}(\mathbf{x}, \mathbf{y})] d\mathbf{x} d\mathbf{y} \right|. \quad (\text{B.13})$$

One can rewrite the argument of this supremum by Eqs. (1)-(2) as

$$\begin{aligned} \int_{\mathcal{S} \times \mathcal{S}} g(\mathbf{x}, \mathbf{y}) [k(\mathbf{x}, \mathbf{y}) - \hat{k}(\mathbf{x}, \mathbf{y})] d\mathbf{x} d\mathbf{y} &= \int_{\mathcal{S} \times \mathcal{S}} g(\mathbf{x}, \mathbf{y}) \left[ \int_{\mathbb{R}^d} \cos(\omega^T(\mathbf{x} - \mathbf{y})) d(\Lambda - \Lambda_m)(\omega) \right] d\mathbf{x} d\mathbf{y} \\ &= \int_{\mathbb{R}^d} \left[ \int_{\mathcal{S} \times \mathcal{S}} g(\mathbf{x}, \mathbf{y}) \cos(\omega^T(\mathbf{x} - \mathbf{y})) d\mathbf{x} d\mathbf{y} \right] d(\Lambda - \Lambda_m)(\omega), \end{aligned}$$

and thus

$$\|k - \hat{k}\|_{L^r(\mathcal{S})} = \sup_{\tilde{g} \in \tilde{\mathcal{G}}} |(\Lambda - \Lambda_m)\tilde{g}|, \quad (\text{B.14})$$

where  $\tilde{\mathcal{G}} := \{\tilde{g}_g : g \in \mathcal{G}\}$ ,  $\tilde{g}_g(\boldsymbol{\omega}) = \int_{\mathcal{S} \times \mathcal{S}} g(\mathbf{x}, \mathbf{y}) \cos(\boldsymbol{\omega}^T(\mathbf{x} - \mathbf{y})) d\mathbf{x} d\mathbf{y}$  and  $\tilde{g}_g$  is continuous. Hence, using (B.14) with the symmetrization lemma [11, Lemma 2.3.1] and (B.13), we have

$$\begin{aligned} \mathbb{E}_{\boldsymbol{\omega}_{1:m}} \|k - \hat{k}\|_{L^r(\mathcal{S})} &\leq 2\mathbb{E}_{\boldsymbol{\omega}_{1:m}} \mathbb{E}_{\boldsymbol{\varepsilon}} \sup_{\tilde{g} \in \tilde{\mathcal{G}}} \left| \frac{1}{m} \sum_{i=1}^m \varepsilon_i \tilde{g}(\boldsymbol{\omega}_i) \right| = \frac{2}{m} \mathbb{E}_{\boldsymbol{\omega}_{1:m}} \mathbb{E}_{\boldsymbol{\varepsilon}} \sup_{g \in \mathcal{G}} \left| \sum_{i=1}^m \varepsilon_i \int_{\mathcal{S} \times \mathcal{S}} g(\mathbf{x}, \mathbf{y}) \cos(\boldsymbol{\omega}_i^T(\mathbf{x} - \mathbf{y})) d\mathbf{x} d\mathbf{y} \right| \\ &= \frac{2}{m} \mathbb{E}_{\boldsymbol{\omega}_{1:m}} \mathbb{E}_{\boldsymbol{\varepsilon}} \sup_{g \in \mathcal{G}} \left| \int_{\mathcal{S} \times \mathcal{S}} g(\mathbf{x}, \mathbf{y}) \left[ \sum_{i=1}^m \varepsilon_i \cos(\boldsymbol{\omega}_i^T(\mathbf{x} - \mathbf{y})) \right] d\mathbf{x} d\mathbf{y} \right| = \frac{2}{m} \mathbb{E}_{\boldsymbol{\omega}_{1:m}} \mathbb{E}_{\boldsymbol{\varepsilon}} \left\| \sum_{i=1}^m \varepsilon_i \cos(\langle \boldsymbol{\omega}_i, \cdot - \cdot \rangle) \right\|_{L^r(\mathcal{S})} \end{aligned} \quad (\text{B.15})$$

where  $(\varepsilon_i)_{i=1}^m$  is a Rademacher sequence and  $\mathbb{E}_{\boldsymbol{\varepsilon}}$  is the conditional expectation w.r.t.  $(\varepsilon_i)_{i=1}^m$  with  $(\boldsymbol{\omega}_i)_{i=1}^m$  being the conditioning random variables. Notice that the measurability of  $\tilde{g}_g$ -s with the countable cardinality of  $\tilde{\mathcal{G}}$  enabled us to write expectations instead of outer expectations in [11, Lemma 2.3.1, page 108-110], and hence in Eq. (B.15).

- **Bounding  $\mathbb{E}_{\boldsymbol{\varepsilon}} \left\| \sum_{i=1}^m \varepsilon_i \cos(\langle \boldsymbol{\omega}_i, \cdot - \cdot \rangle) \right\|_{L^r(\mathcal{S})}$  by the type of  $L^r(\mathcal{S})$ :**

$$\mathbb{E}_{\boldsymbol{\varepsilon}} \left\| \sum_{i=1}^m \varepsilon_i \cos(\langle \boldsymbol{\omega}_i, \cdot - \cdot \rangle) \right\|_{L^r(\mathcal{S})} \stackrel{(*)}{\leq} C'_r \left( \sum_{i=1}^m \left\| \cos(\langle \boldsymbol{\omega}_i, \cdot - \cdot \rangle) \right\|_{L^r(\mathcal{S})}^{\min\{r, 2\}} \right)^{\frac{1}{\min\{r, 2\}}} \leq C'_r \text{vol}^{2/r}(\mathcal{S}) m^{\max\{\frac{1}{2}, \frac{1}{r}\}}, \quad (\text{B.16})$$

since  $L^r(\mathcal{S})$  is of type  $\min(2, r)$  [6, page 73] and there exists a universal constant  $C'_r$  independent of  $\mathcal{S}$  (the so-called Khintchine constant) [5, page 247] such that  $(*)$  holds; in addition we used

$$\sum_{i=1}^m \left\| \cos(\langle \boldsymbol{\omega}_i, \cdot - \cdot \rangle) \right\|_{L^r(\mathcal{S})}^{\min\{2, r\}} = \sum_{i=1}^m \left( \int_{\mathcal{S} \times \mathcal{S}} |\cos(\boldsymbol{\omega}_i^T(\mathbf{x} - \mathbf{y}))|^r d\mathbf{x} d\mathbf{y} \right)^{\frac{\min\{2, r\}}{r}} \leq m [\text{vol}^2(\mathcal{S})]^{\frac{\min\{2, r\}}{r}},$$

and  $\frac{1}{\min\{2, r\}} = \max\{\frac{1}{2}, \frac{1}{r}\}$ .

Combining (B.12)–(B.16) and using the bound on  $\text{vol}(\mathcal{S})$  given in the proof of Corollary 2 yields the result.  $\square$

### B.3 Proof of Theorem 5

Below we give the detailed proof of Theorem 5. At high-level the proof goes as follows: (i) By the compactness of  $\mathcal{S}_{\Delta}$  (implied by that of  $\mathcal{S}$ ) one can take an  $r$ -net covering  $\mathcal{S}_{\Delta}$  (for any  $r > 0$ ). (ii) Small approximation error can be guaranteed at the centers of the  $r$ -net by Bernstein's inequality combined with a union bound. (iii) Propagation of the error from the centers to arbitrary points is achieved by Lipschitzness. (iv) The Lipschitz constant is, however, a random quantity and we show with high probability that it is 'not too large'. (v) Union bounding the two events (small errors at the centers and small Lipschitz constant) leads to a uniform bound for arbitrary  $r$ , which holds with high probability. (vi) Optimizing over  $r$  gives the stated result.

Formally, the proof is as follows. Let us define

$$B_{\mathbf{p}, \mathbf{q}, \mathcal{S}} := \mathbb{E}_{\boldsymbol{\omega} \sim \Lambda} \left[ \sup_{\mathbf{z} \in \text{conv}(\mathcal{S}_{\Delta})} \|\nabla_{\mathbf{z}} f(\mathbf{z}; \boldsymbol{\omega})\|_2 \right],$$

where  $f(\mathbf{z}; \boldsymbol{\omega}) = \partial^{\mathbf{p}, \mathbf{q}} k(\mathbf{z}) - \boldsymbol{\omega}^{\mathbf{p}}(-\boldsymbol{\omega})^{\mathbf{q}} h_{|\mathbf{p}+\mathbf{q}|}(\boldsymbol{\omega}^T \mathbf{z})$ . Let us notice that since  $\text{conv}(\mathcal{S}_{\Delta})$  is compact (by the compactness of  $\mathcal{S}_{\Delta}$ , implied by that of  $\mathcal{S}$ ) and  $\mathbf{z} \mapsto \|\nabla_{\mathbf{z}} f(\mathbf{z}; \boldsymbol{\omega})\|_2$  is continuous, the supremum inside the expectation in  $B_{\mathbf{p}, \mathbf{q}, \mathcal{S}}$  is finite for any  $\boldsymbol{\omega}$ .

- **Covering of  $\mathcal{S}_{\Delta}$ :** By the compactness of  $\mathcal{S}_{\Delta}$  there exist an  $r$ -net with at most

$$N = \left( \frac{2|\mathcal{S}_{\Delta}|}{r} + 1 \right)^d \leq \left( \frac{4|\mathcal{S}|}{r} + 1 \right)^d \quad (\text{B.17})$$

balls covering  $\mathcal{S}_{\Delta}$  [10, Lemma 2.5, page 20], where we used that  $|\mathcal{S}_{\Delta}| \leq 2|\mathcal{S}|$ . Let us denote the centers of this  $r$ -net by  $\mathbf{c}_1, \dots, \mathbf{c}_N$ .

- **Bounding  $\bar{f}(\mathbf{b}; \omega_{1:m}) - \bar{f}(\mathbf{a}; \omega_{1:m})$ , where  $\mathbf{a}, \mathbf{b} \in \mathcal{S}_\Delta$ ;  $\omega_{1:m} = (\omega_1, \dots, \omega_m)$  is fixed:** Let

$$\bar{f}(\mathbf{z}; \omega_{1:m}) = \frac{1}{m} \sum_{j=1}^m f(\mathbf{z}; \omega_j) = \frac{1}{m} \sum_{j=1}^m [\partial^{\mathbf{p}, \mathbf{q}} k(\mathbf{z}) - \omega_j^{\mathbf{p}} (-\omega_j)^{\mathbf{q}} h_{|\mathbf{p}+\mathbf{q}|}(\omega_j^T \mathbf{z})].$$

$\mathbf{z} \mapsto \bar{f}(\mathbf{z}; \omega_{1:m})$  is continuously differentiable since  $\psi$  is so. Thus by the mean value theorem  $\exists t \in (0, 1)$  such that

$$\bar{f}(\mathbf{b}; \omega_{1:m}) - \bar{f}(\mathbf{a}; \omega_{1:m}) = \langle \nabla_{\mathbf{z}} \bar{f}(t\mathbf{a} + (1-t)\mathbf{b}; \omega_{1:m}), \mathbf{b} - \mathbf{a} \rangle.$$

Hence by the Cauchy-Bunyakovsky-Schwarz inequality, we get

$$\begin{aligned} |\bar{f}(\mathbf{b}; \omega_{1:m}) - \bar{f}(\mathbf{a}; \omega_{1:m})| &\leq \|\nabla_{\mathbf{z}} \bar{f}(t\mathbf{a} + (1-t)\mathbf{b}; \omega_{1:m})\|_2 \|\mathbf{b} - \mathbf{a}\|_2 \leq \sup_{\mathbf{z} \in \text{conv}(\mathcal{S}_\Delta)} \|\nabla_{\mathbf{z}} \bar{f}(\mathbf{z}; \omega_{1:m})\|_2 \|\mathbf{b} - \mathbf{a}\|_2 \\ &=: L(\omega_{1:m}) \|\mathbf{b} - \mathbf{a}\|_2, \end{aligned} \quad (\text{B.18})$$

where we used the compactness of  $\text{conv}(\mathcal{S}_\Delta)$  (implied by that of  $\mathcal{S}_\Delta$ ) and the continuity of the  $\mathbf{z} \mapsto \|\nabla_{\mathbf{z}} \bar{f}(\mathbf{z}; \omega_{1:m})\|_2$  mapping to guarantee that  $L(\omega_{1:m})$  exists, and it is finite for any  $\omega_{1:m}$ .

- **Bound on  $\mathbb{E}_{\omega_1, \dots, \omega_m} [L(\omega_{1:m})]$ :** Using the definition of  $\bar{f}(\mathbf{z}; \omega_{1:m})$ , the linearity of differentiation, and the triangle inequality, we get

$$\|\nabla_{\mathbf{z}} \bar{f}(\mathbf{z}; \omega_{1:m})\|_2 = \left\| \nabla_{\mathbf{z}} \left[ \frac{1}{m} \sum_{j=1}^m f(\mathbf{z}; \omega_j) \right] \right\|_2 = \left\| \frac{1}{m} \sum_{j=1}^m \nabla_{\mathbf{z}} f(\mathbf{z}; \omega_j) \right\|_2 \leq \frac{1}{m} \sum_{j=1}^m \|\nabla_{\mathbf{z}} f(\mathbf{z}; \omega_j)\|_2.$$

Therefore,

$$\sup_{\mathbf{z} \in \text{conv}(\mathcal{S}_\Delta)} \|\nabla_{\mathbf{z}} \bar{f}(\mathbf{z}; \omega_{1:m})\|_2 \leq \frac{1}{m} \sum_{j=1}^m \sup_{\mathbf{z} \in \text{conv}(\mathcal{S}_\Delta)} \|\nabla_{\mathbf{z}} f(\mathbf{z}; \omega_j)\|_2$$

and

$$\begin{aligned} \mathbb{E}_{\omega_{1:m}} [L(\omega_{1:m})] &= \mathbb{E}_{\omega_{1:m}} \left[ \sup_{\mathbf{z} \in \text{conv}(\mathcal{S}_\Delta)} \|\nabla_{\mathbf{z}} f(\mathbf{z}; \omega_{1:m})\|_2 \right] \leq \frac{1}{m} \sum_{j=1}^m \mathbb{E}_{\omega_{1:m}} \left[ \sup_{\mathbf{z} \in \text{conv}(\mathcal{S}_\Delta)} \|\nabla_{\mathbf{z}} f(\mathbf{z}; \omega_j)\|_2 \right] \\ &= \frac{1}{m} \sum_{j=1}^m B_{\mathbf{p}, \mathbf{q}, s} = B_{\mathbf{p}, \mathbf{q}, s}. \end{aligned} \quad (\text{B.19})$$

- **Bound on  $B_{\mathbf{p}, \mathbf{q}, s}$ :** Note that

$$\begin{aligned} \sup_{\mathbf{z} \in \text{conv}(\mathcal{S}_\Delta)} \|\nabla_{\mathbf{z}} f(\mathbf{z}; \omega)\|_2 &= \sup_{\mathbf{z} \in \text{conv}(\mathcal{S}_\Delta)} \|\nabla_{\mathbf{z}} [\partial^{\mathbf{p}, \mathbf{q}} k(\mathbf{z}) - \omega^{\mathbf{p}} (-\omega)^{\mathbf{q}} h_{|\mathbf{p}+\mathbf{q}|}(\omega^T \mathbf{z})]\|_2 \\ &\leq \sup_{\mathbf{z} \in \text{conv}(\mathcal{S}_\Delta)} (\|\nabla_{\mathbf{z}} [\partial^{\mathbf{p}, \mathbf{q}} k(\mathbf{z})]\|_2 + \|\nabla_{\mathbf{z}} [\omega^{\mathbf{p}} (-\omega)^{\mathbf{q}} h_{|\mathbf{p}+\mathbf{q}|}(\omega^T \mathbf{z})]\|_2) \\ &\leq \sup_{\mathbf{z} \in \text{conv}(\mathcal{S}_\Delta)} \|\nabla_{\mathbf{z}} [\partial^{\mathbf{p}, \mathbf{q}} k(\mathbf{z})]\|_2 + \sup_{\mathbf{z} \in \text{conv}(\mathcal{S}_\Delta)} \|\nabla_{\mathbf{z}} [\omega^{\mathbf{p}} (-\omega)^{\mathbf{q}} h_{|\mathbf{p}+\mathbf{q}|}(\omega^T \mathbf{z})]\|_2 \\ &= D_{\mathbf{p}, \mathbf{q}, s} + \sup_{\mathbf{z} \in \text{conv}(\mathcal{S}_\Delta)} \|\nabla_{\mathbf{z}} [\omega^{\mathbf{p}} (-\omega)^{\mathbf{q}} h_{|\mathbf{p}+\mathbf{q}|}(\omega^T \mathbf{z})]\|_2. \end{aligned} \quad (\text{B.20})$$

By the homogeneity of norms ( $\|a\mathbf{v}\| = |a| \|\mathbf{v}\|$ ), the chain rule, and  $|h_a(v)| \leq 1$  ( $\forall a, \forall v$ )

$$\|\nabla_{\mathbf{z}} [\omega^{\mathbf{p}} (-\omega)^{\mathbf{q}} h_{|\mathbf{p}+\mathbf{q}|}(\omega^T \mathbf{z})]\|_2 = |\omega^{\mathbf{p}+\mathbf{q}}| \|h_{|\mathbf{p}+\mathbf{q}|+1}(\omega^T \mathbf{z}) \omega\|_2 \leq |\omega^{\mathbf{p}+\mathbf{q}}| \|\omega\|_2. \quad (\text{B.21})$$

Combining Eq. (B.20) and (B.21) results in the bound

$$B_{\mathbf{p}, \mathbf{q}, s} = \mathbb{E}_{\omega \sim \Lambda} \left[ \sup_{\mathbf{z} \in \text{conv}(\mathcal{S}_\Delta)} \|\nabla_{\mathbf{z}} f(\mathbf{z}; \omega)\|_2 \right] \leq D_{\mathbf{p}, \mathbf{q}, s} + \mathbb{E}_{\omega \sim \Lambda} [|\omega^{\mathbf{p}+\mathbf{q}}| \|\omega\|_2] = D_{\mathbf{p}, \mathbf{q}, s} + E_{\mathbf{p}, \mathbf{q}}. \quad (\text{B.22})$$

- **Error propagation from the net centers:** We will use the following note to propagate the error from the net centers ( $\mathbf{c}_j$ ,  $j = 1, \dots, N$ ) to an arbitrary  $\mathbf{z} \in \mathcal{S}_\Delta$  point. Note: If  $|\bar{f}(\mathbf{c}_j; \omega_{1:m})| < \frac{\epsilon}{2}$  ( $\forall j$ ) and  $L(\omega_{1:m}) < \frac{\epsilon}{2r}$ , then

$$|\bar{f}(\mathbf{z}; \omega_{1:m})| < \epsilon \quad (\forall \mathbf{z} \in \mathcal{S}_\Delta). \quad (\text{B.23})$$

Indeed

$$|\bar{f}(\mathbf{z}; \omega_{1:m})| - \underbrace{|\bar{f}(\mathbf{c}_j; \omega_{1:m})|}_{< \frac{\epsilon}{2}} \leq |\bar{f}(\mathbf{z}; \omega_{1:m}) - \bar{f}(\mathbf{c}_j; \omega_{1:m})| \leq \underbrace{L(\omega_{1:m})}_{< \frac{\epsilon}{2r}} \underbrace{\|\mathbf{z} - \mathbf{c}_j\|_2}_{\leq r} < \frac{\epsilon}{2},$$

where we used (B.18) and our assumptions in the note, thereby yielding (B.23).

• **Guaranteeing the conditions of (B.23) with high probability:**

- Notice that  $\mathbb{E}_{\omega \sim \Lambda}[f(\mathbf{z}; \omega)] = \mathbf{0}$  ( $\forall \mathbf{z}$ ). Also since (7) holds, applying Bernstein's inequality for the individual  $\mathbf{c}_j$  points (Lemma C.3;  $\xi_n := f(\mathbf{c}_j; \omega_n)$ ,  $n = 1, \dots, m$ ;  $S := \sqrt{m}\sigma$ ) gives that for any  $\eta > 0$

$$\Lambda^m \left( |\bar{f}(\mathbf{c}_j; \omega_{1:m})| \geq \frac{\eta\sigma}{\sqrt{m}} \right) \leq e^{-\frac{1}{2} \frac{\eta^2}{1 + \frac{\eta L}{\sqrt{m}\sigma}}}. \quad (\text{B.24})$$

Setting  $\epsilon = \frac{2\eta\sigma}{\sqrt{m}}$ , (B.24) is written as

$$\Lambda^m \left( |\bar{f}(\mathbf{c}_j; \omega_{1:m})| < \frac{\epsilon}{2} \right) \geq 1 - e^{-\frac{1}{2} \frac{\left(\frac{\sqrt{m}\epsilon}{2\sigma}\right)^2}{1 + \frac{\sqrt{m}\epsilon}{2\sigma} \frac{L}{\sqrt{m}\sigma}}} = 1 - e^{-\frac{m\epsilon^2}{8\sigma^2(1 + \frac{\epsilon L}{2\sigma^2})}}.$$

By union bounding ( $j = 1, \dots, N$ ), we get

$$\Lambda^m \left( \bigcap_{j=1}^N \left\{ |\bar{f}(\mathbf{c}_j; \omega_{1:m})| < \frac{\epsilon}{2} \right\} \right) \geq 1 - N e^{-\frac{m\epsilon^2}{8\sigma^2(1 + \frac{\epsilon L}{2\sigma^2})}}. \quad (\text{B.25})$$

- **Condition**  $L(\omega_{1:m}) < \frac{\epsilon}{2r}$ : Applying Markov's inequality to  $L(\omega_{1:m})$  (note that  $L(\omega_{1:m})$  is non-negative), for any  $t > 0$ , we obtain

$$\Lambda^m (L(\omega_{1:m}) \geq t) \leq \frac{\mathbb{E}_{\omega_1, \dots, \omega_m} [L(\omega_{1:m})]}{t} \leq \frac{D_{\mathbf{p}, \mathbf{q}, \mathbf{s}} + E_{\mathbf{p}, \mathbf{q}}}{t},$$

by invoking (B.19) and (B.22). Choosing  $t = \frac{\epsilon}{2r}$ , we have

$$\Lambda^m \left( L(\omega_{1:m}) < \frac{\epsilon}{2r} \right) \geq 1 - \frac{2r}{\epsilon} (D_{\mathbf{p}, \mathbf{q}, \mathbf{s}} + E_{\mathbf{p}, \mathbf{q}}). \quad (\text{B.26})$$

- **Final bound for any  $r > 0$ :** By (B.25) and (B.26), and substituting the explicit form of  $N$  in (B.17), we get

$$\begin{aligned} \Lambda^m \left( \sup_{\mathbf{z} \in \mathcal{S}_\Delta} |\bar{f}(\mathbf{z}; \omega_{1:m})| < \epsilon \right) &\geq \Lambda^m \left( \left\{ L(\omega_{1:m}) < \frac{\epsilon}{2r} \right\} \bigcap \bigcap_{j=1}^N \left\{ |\bar{f}(\mathbf{c}_j; \omega_{1:m})| < \frac{\epsilon}{2} \right\} \right) \\ &\geq 1 - \left( \frac{4|\mathcal{S}|}{r} + 1 \right)^d e^{-\frac{m\epsilon^2}{8\sigma^2(1 + \frac{\epsilon L}{2\sigma^2})}} - \frac{2r}{\epsilon} (D_{\mathbf{p}, \mathbf{q}, \mathbf{s}} + E_{\mathbf{p}, \mathbf{q}}) \stackrel{(\dagger)}{\geq} 1 - c_* - \kappa_1 r^{-d} - \kappa_2 r, \end{aligned} \quad (\text{B.27})$$

where we invoked the

$$\left( \frac{4|\mathcal{S}|}{r} + 1 \right)^d = \left[ 2 \left( \frac{4|\mathcal{S}|}{r} + \frac{1}{2} \right) \right]^d = 2^d \left( \frac{4|\mathcal{S}|}{r} + \frac{1}{2} \right)^d \stackrel{(\dagger)}{\leq} 2^d \frac{1}{2} \left[ \left( \frac{4|\mathcal{S}|}{r} \right)^d + 1^d \right] = 2^{d-1} \left[ \left( \frac{4|\mathcal{S}|}{r} \right)^d + 1 \right]$$

Jensen's inequality in  $(\dagger)$ ,  $c_* := 2^{d-1} e^{-\frac{m\epsilon^2}{8\sigma^2(1 + \frac{\epsilon L}{2\sigma^2})}}$ ,  $\kappa_1 := 4^d |\mathcal{S}|^d c_*$  and  $\kappa_2 = \frac{2}{\epsilon} (D_{\mathbf{p}, \mathbf{q}, \mathbf{s}} + E_{\mathbf{p}, \mathbf{q}})$ .

- **Matching the two terms to choose  $r$ :** Maximizing w.r.t.  $r$  in (B.27)

$$f(r) = \kappa_1 r^{-d} + \kappa_2 r \Rightarrow f'(r) = \kappa_1 (-d) r^{-d-1} + \kappa_2 = 0 \Rightarrow \frac{d\kappa_1}{\kappa_2} = r^{d+1}$$

we note that  $r = \left( \frac{d\kappa_1}{\kappa_2} \right)^{\frac{1}{d+1}}$  maximizes it. Using this in (B.27), we have

$$\begin{aligned} \Lambda^m \left( \sup_{\mathbf{z} \in \mathcal{S}_\Delta} |\bar{f}(\mathbf{z}; \omega_{1:m})| \geq \epsilon \right) &\leq c_* + \kappa_1 \left( \frac{d\kappa_1}{\kappa_2} \right)^{-\frac{d}{d+1}} + \kappa_2 \left( \frac{d\kappa_1}{\kappa_2} \right)^{\frac{1}{d+1}} = c_* + F_d \kappa_1^{\frac{1}{d+1}} \kappa_2^{\frac{d}{d+1}} \\ &= 2^{d-1} e^{-\frac{m\epsilon^2}{8\sigma^2(1 + \frac{\epsilon L}{2\sigma^2})}} + F_d \left[ 2^{3d-1} |\mathcal{S}|^d e^{-\frac{m\epsilon^2}{8\sigma^2(1 + \frac{\epsilon L}{2\sigma^2})}} \right]^{\frac{1}{d+1}} \left[ \frac{2}{\epsilon} (D_{\mathbf{p}, \mathbf{q}, \mathbf{s}} + E_{\mathbf{p}, \mathbf{q}}) \right]^{\frac{d}{d+1}} \\ &= 2^{d-1} e^{-\frac{m\epsilon^2}{8\sigma^2(1 + \frac{\epsilon L}{2\sigma^2})}} + F_d 2^{\frac{4d-1}{d+1}} \left[ \frac{|\mathcal{S}| (D_{\mathbf{p}, \mathbf{q}, \mathbf{s}} + E_{\mathbf{p}, \mathbf{q}})}{\epsilon} \right]^{\frac{d}{d+1}} e^{-\frac{m\epsilon^2}{8(d+1)\sigma^2(1 + \frac{\epsilon L}{2\sigma^2})}}, \end{aligned}$$

where  $F_d := d^{-\frac{d}{d+1}} + d^{\frac{1}{d+1}}$ .

#### B.4 Proof of bounded $\text{supp}(\Lambda) \Rightarrow (7)$

We prove that the boundedness of  $\text{supp}(\Lambda)$  implies that of  $f$  [see (B.28)], specifically (7).

*Proof:* Indeed, let

$$f(\mathbf{z}; \boldsymbol{\omega}) = \partial^{\mathbf{p}, \mathbf{q}} k(\mathbf{z}) - \boldsymbol{\omega}^{\mathbf{p}}(-\boldsymbol{\omega})^{\mathbf{q}} h_{|\mathbf{p}+\mathbf{q}|}(\boldsymbol{\omega}^T \mathbf{z}) = \left[ \int_{\mathbb{R}^d} \boldsymbol{\omega}^{\mathbf{p}}(-\boldsymbol{\omega})^{\mathbf{q}} h_{|\mathbf{p}+\mathbf{q}|}(\boldsymbol{\omega}^T \mathbf{z}) d\Lambda(\boldsymbol{\omega}) \right] - \boldsymbol{\omega}^{\mathbf{p}}(-\boldsymbol{\omega})^{\mathbf{q}} h_{|\mathbf{p}+\mathbf{q}|}(\boldsymbol{\omega}^T \mathbf{z}). \quad (\text{B.28})$$

Applying the triangle inequality and  $|h_a(v)| \leq 1$  ( $\forall a, \forall v$ ) we have

$$\begin{aligned} |f(\mathbf{z}; \boldsymbol{\omega})| &\leq \left| \int_{\mathbb{R}^d} \mathbf{s}^{\mathbf{p}}(-\mathbf{s})^{\mathbf{q}} h_{|\mathbf{p}+\mathbf{q}|}(\mathbf{s}^T \mathbf{z}) d\Lambda(\mathbf{s}) \right| + |\boldsymbol{\omega}^{\mathbf{p}}(-\boldsymbol{\omega})^{\mathbf{q}} h_{|\mathbf{p}+\mathbf{q}|}(\boldsymbol{\omega}^T \mathbf{z})| \leq \int_{\mathbb{R}^d} |\mathbf{s}^{\mathbf{p}}(-\mathbf{s})^{\mathbf{q}} h_{|\mathbf{p}+\mathbf{q}|}(\mathbf{s}^T \mathbf{z})| d\Lambda(\mathbf{s}) + |\boldsymbol{\omega}^{\mathbf{p}+\mathbf{q}}| \\ &\leq \int_{\mathbb{R}^d} |\mathbf{s}^{\mathbf{p}+\mathbf{q}}| d\Lambda(\mathbf{s}) + |\boldsymbol{\omega}^{\mathbf{p}+\mathbf{q}}| = \int_{\text{supp}(\Lambda)} |\mathbf{s}^{\mathbf{p}+\mathbf{q}}| d\Lambda(\mathbf{s}) + |\boldsymbol{\omega}^{\mathbf{p}+\mathbf{q}}| \leq 2 \sup_{\mathbf{s} \in \text{supp}(\Lambda)} |\mathbf{s}^{\mathbf{p}+\mathbf{q}}|. \end{aligned}$$

$K := \sup_{\mathbf{s} \in \text{supp}(\Lambda)} |\mathbf{s}^{\mathbf{p}+\mathbf{q}}|$  is finite since  $\text{supp}(\Lambda)$  is bounded, thus  $|f(\mathbf{z}; \boldsymbol{\omega})|$  is bounded.

### C Supplementary results

In this section, we present some technical results that are used in the proofs.

**Lemma C.1** (McDiarmid Inequality [7]). *Let  $(X_i)_{i=1}^m$  be  $\mathcal{X}$ -valued independent random variables. Suppose  $f : \mathcal{X}^m \rightarrow \mathbb{R}$  satisfies the bounded difference property,*

$$\sup_{u_1, \dots, u_m, u'_r \in \mathcal{X}} |f(u_1, \dots, u_m) - f(u_1, \dots, u_{r-1}, u'_r, u_{r+1}, \dots, u_m)| \leq c_r \quad (\forall r = 1, \dots, m). \quad (\text{C.1})$$

Then for any  $\epsilon > 0$ ,

$$\mathbb{P}(f(X_1, \dots, X_m) - \mathbb{E}[f(X_1, \dots, X_m)] \geq \epsilon) \leq e^{-\frac{2\epsilon^2}{\sum_{r=1}^m c_r^2}}.$$

*Note:* specifically, if  $c = c_r$  ( $\forall r$ ) then applying a  $\tau = \frac{2\epsilon^2}{\sum_{r=1}^m c_r^2} = \frac{2\epsilon^2}{mc^2} \Leftrightarrow \epsilon = c\sqrt{\frac{\tau m}{2}}$  reparameterization one gets  $\mathbb{P}(f(X_1, \dots, X_m) < \mathbb{E}[f(X_1, \dots, X_m)] + c\sqrt{\frac{\tau m}{2}}) \geq 1 - e^{-\tau}$ .

**Lemma C.2.** For  $a > 1$ ,  $\int_0^1 \sqrt{\log \frac{a}{\epsilon}} d\epsilon \leq \sqrt{\log a} + \frac{1}{2\sqrt{\log a}}$ .

*Proof.* By change of variables, we have  $\int_0^1 \sqrt{\log \frac{a}{\epsilon}} d\epsilon = a \int_{\log a}^\infty \sqrt{t} e^{-t} dt$ . Applying partial integration, we have

$$\int_{\log a}^\infty \sqrt{t} e^{-t} dt = [\sqrt{t} e^{-t}]_{\log a}^\infty + \int_{\log a}^\infty \frac{1}{2\sqrt{t}} e^{-t} dt \leq \frac{\sqrt{\log a}}{a} + \frac{1}{2\sqrt{\log a}} \int_{\log a}^\infty e^{-t} dt = \frac{\sqrt{\log a}}{a} + \frac{1}{2a\sqrt{\log a}},$$

thereby yields the result.  $\square$

**Lemma C.3** (Bernstein inequality [12]). *Let  $\xi \in \mathbb{R}$  be a random variable,  $\mathbb{E}_{\xi \sim \mathbb{P}}[\xi] = 0$ , and assume that  $\exists L > 0, S > 0$  satisfying*

$$\sum_{j=1}^m \mathbb{E}_{\xi_j \sim \mathbb{P}}[|\xi_j|^M] \leq \frac{M! S^2 L^{M-2}}{2} \quad (\forall M \geq 2),$$

where  $(\xi_j)_{j=1}^m \stackrel{i.i.d.}{\sim} \mathbb{P}$ . Then for any  $0 < m \in \mathbb{N}, \eta > 0$ ,

$$\mathbb{P}^m \left( \left| \sum_{j=1}^m \xi_j \right| \geq \eta S \right) \leq e^{-\frac{1}{2} \frac{\eta^2}{1 + \frac{\eta^2}{S^2}}}.$$

**Lemma C.4** ( $L^r$  norm as countable supremum). *Assume that  $1 < \tilde{r} < \infty$ . If  $(X, \mathcal{A}, \mu)$ ,  $\mu(X) < \infty$ ,  $\frac{1}{r} + \frac{1}{\tilde{r}} = 1$ , then  $[L^{\tilde{r}}(X, \mathcal{A}, \mu)]^* = \{F_f : f \in L^r(X, \mathcal{A}, \mu)\}$ , where  $F_f(u) = \int_X u f d\mu$ , and  $\|f\|_{L^r} = \|F_f\| (= \sup_{\|g\|_{L^{\tilde{r}}}=1} |F_f(g)|)$ ; see [8, Theorem 4.1]. Specifically, if  $X = \mathcal{S} \subseteq \mathbb{R}^d$  compact and it is endowed with the Borel  $\sigma$ -algebra, then by the separability of  $\mathcal{S}$ ,  $L^{\tilde{r}}(\mathcal{S})$  is also separable [4, Prop. 3.4.5] since the Borel  $\sigma$ -algebra is countably generated [1, page 17 (vol. 2)], thus there exists a countable  $\mathcal{G} \subseteq L^{\tilde{r}}(\mathcal{S})$ , [3, Lemma 6.7] such that  $\|g\|_{L^{\tilde{r}}(\mathcal{S})} = 1$  ( $\forall g \in \mathcal{G}$ ) and  $\|F_f\| = \sup_{g \in \mathcal{G}} |F_f(g)|$ .*

*Note:* the  $\sigma$ -algebra of Lebesgue measurable sets is typically not countably generated [1, page 106 (vol. 1)].

## References

- [1] V. I. Bogachev. *Measure Theory*. Springer, 2007.
- [2] O. Bousquet. New approaches to statistical learning theory. *Annals of the Institute of Statistical Mathematics*, 55:371–389, 2003.
- [3] N. L. Carothers. *A Short Course on Banach Space Theory*. Cambridge University Press, 2004.
- [4] D. L. Cohn. *Measure Theory: Second Edition*. Birkhäuser Basel, 2013.
- [5] M. Ledoux and M. Talagrand. *Probability in Banach Spaces – Isoperimetry and Processes*. Springer-Verlag, 2002.
- [6] J. Lindenstrauss and L. Tzafriri. *Classical Banach Spaces II – Function Spaces*. Springer-Verlag, 1979.
- [7] J. Shawe-Taylor and N. Cristianini. *Kernel Methods for Pattern Analysis*. Cambridge University Press, 2004.
- [8] E. M. Stein and R. Shakarchi. *Functional Analysis: Introduction to Further Topics in Analysis*. Princeton University Press, 2011.
- [9] I. Steinwart and A. Christmann. *Support Vector Machines*. Springer, 2008.
- [10] S. A. van de Geer. *Empirical Processes in M-Estimation*. Cambridge University Press, 2009.
- [11] A. W. van der Vaart and J. A. Wellner. *Weak Convergence and Empirical Processes*. Springer-Verlag, 1996.
- [12] V. Yurinsky. *Sums and Gaussian Vectors*. Springer, 1995.
